# Supplementary material
Source: PubMed Central journal article supplement (PMC6389266)

Supplementary Fig. 3

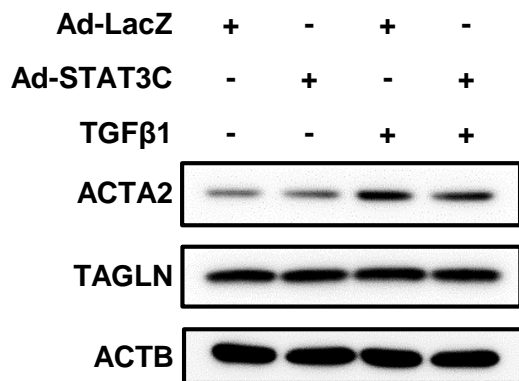

Supplementary Fig. 4

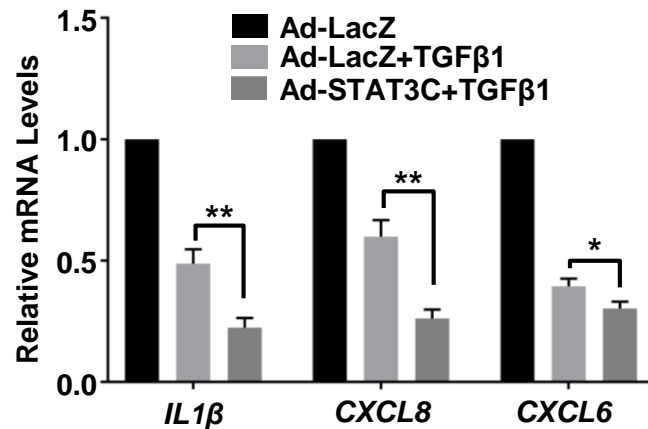

Supplementary Fig. 5

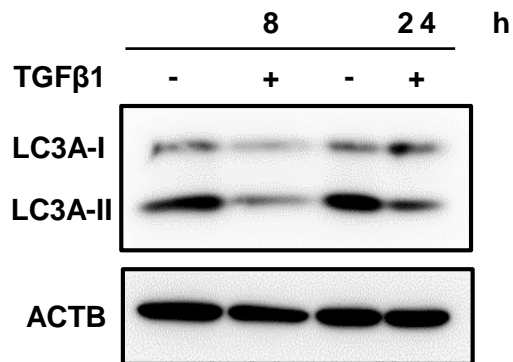

Supplementary Fig. 6

**A**

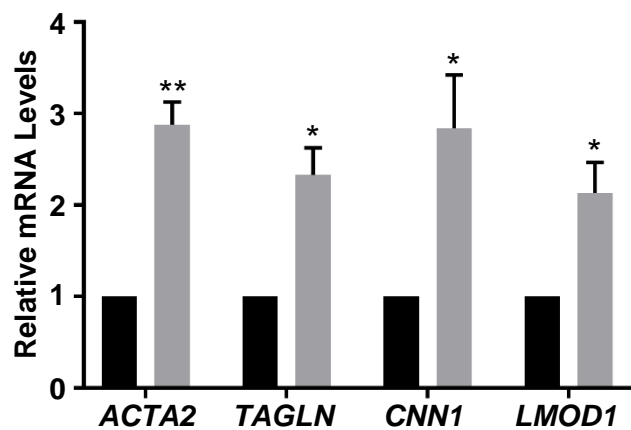

**B**

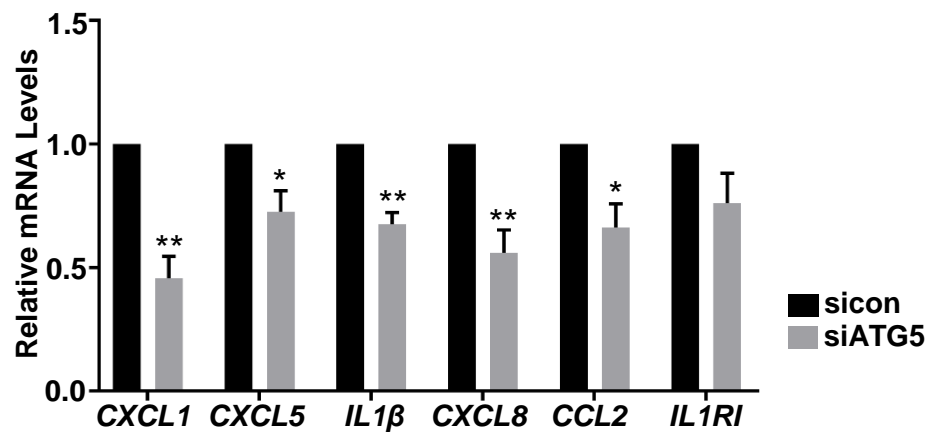

Supplement: NIHMS1005620-supplement-supplemental_figures.pdf [file NIHMS1005620-supplement-supplemental_figures.pdf]
